# Supplementary material for: Strong Epistatic Selection on the RNA Secondary Structure of HIV
Source: PubMed Central journal article supplement (PMC4161434; doi:10.1371/journal.ppat.1004363), 2014-09-11

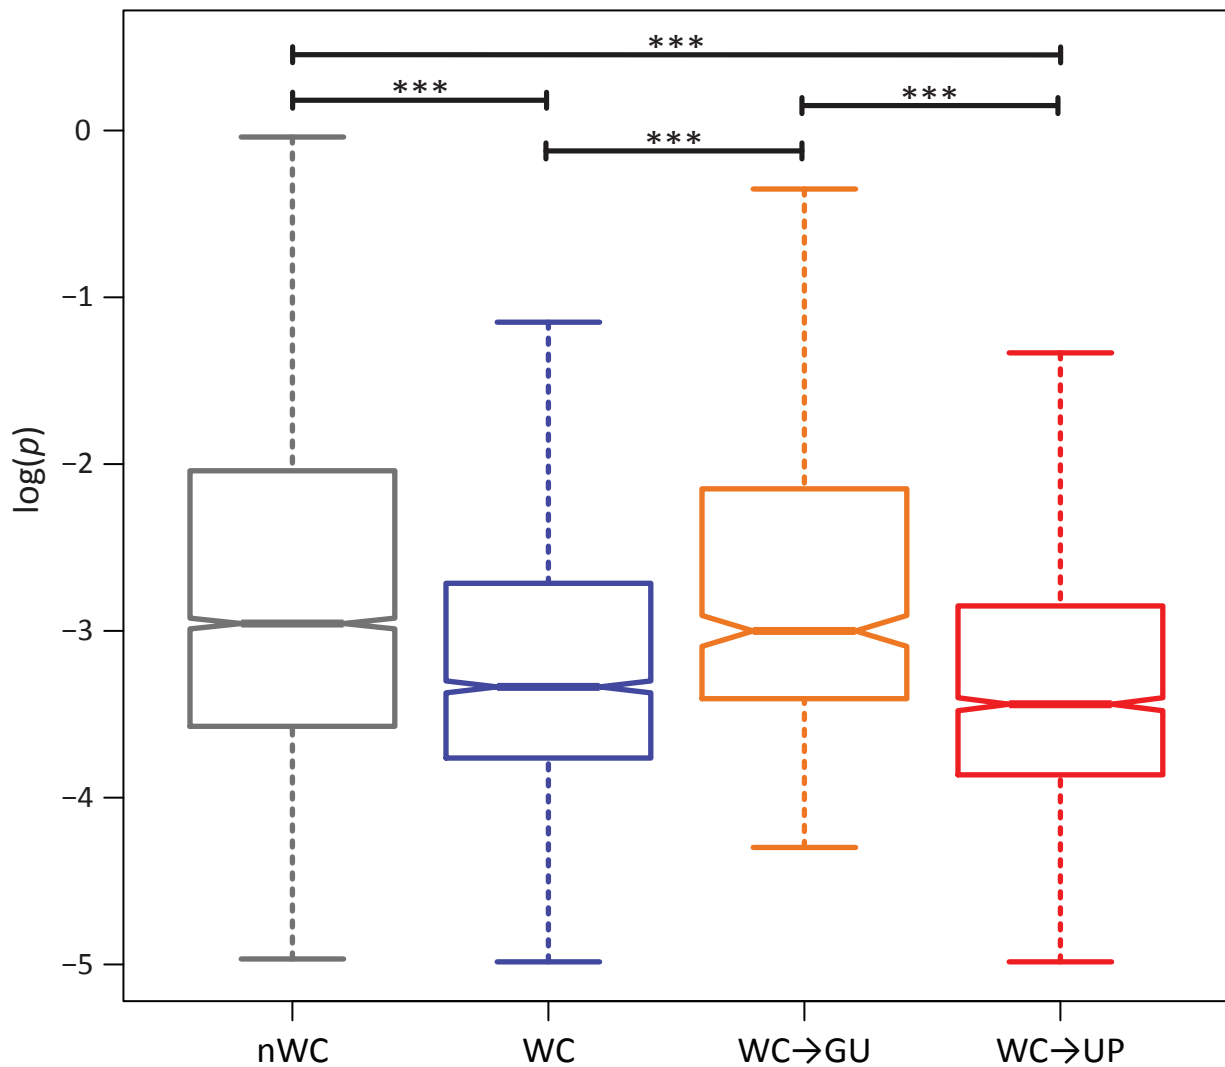

Supplement: ppat.1004363.s001.pdf [file ppat.1004363.s001.pdf]
