# Supplementary material for: Strong Epistatic Selection on the RNA Secondary Structure of HIV
Source: PubMed Central journal article supplement (PMC4161434; doi:10.1371/journal.ppat.1004363), 2014-09-11
Supplement: ppat.1004363.s003.pdf [file ppat.1004363.s003.pdf]

**Table S1. Nucleotide replacement rates computed from observed replacements at nWC sites and from experimental mutation data of Mansky and Temin (1995).**

|     | nWC  | Mansky and Temin (1995) |
|-----|------|-------------------------|
| G→A | 0.39 | 1                       |
| G→U | 0.30 | 0                       |
| G→C | 0.32 | 0                       |
| A→G | 0.36 | 1                       |
| A→U | 0.32 | 0                       |
| A→C | 0.33 | 0                       |
| U→C | 0.37 | 0.50                    |
| U→G | 0.31 | 0.25                    |
| U→A | 0.32 | 0.25                    |
| C→U | 0.37 | 1                       |
| C→G | 0.30 | 0                       |
| C→A | 0.33 | 0                       |
